# Supplementary material for: Protective Effect of Ribes nigrum Extract against Blue Light-Induced Retinal Degeneration In Vitro and In Vivo
Source: MDPI journal article supplement (doi:10.3390/antiox11050832), 2022-04-25
Supplement: s1 [file s1]

## Supplementary Information

### Supplementary Figures

**Figure S1**

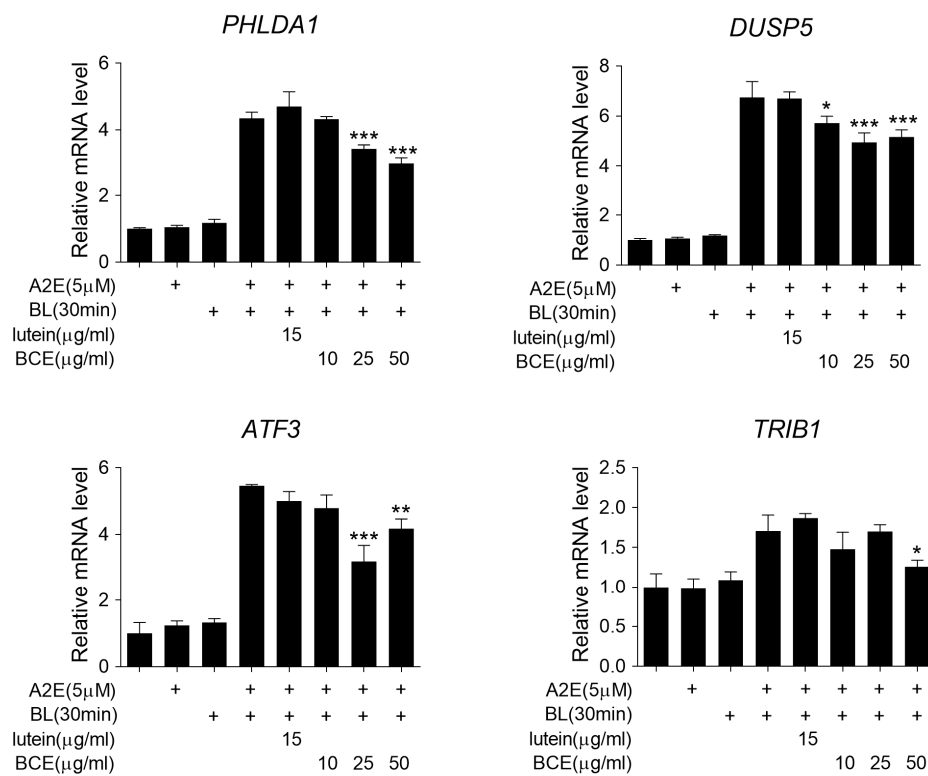

**Supplementary Figure S1.** Relative mRNA levels for NF-κB signaling-related genes. The results are presented as mean ± S.D. (n = 3). \*  $p < 0.05$ , \*\*  $p < 0.01$ , \*\*\*  $p < 0.001$  vs. A2E + BL.

**Figure S2**

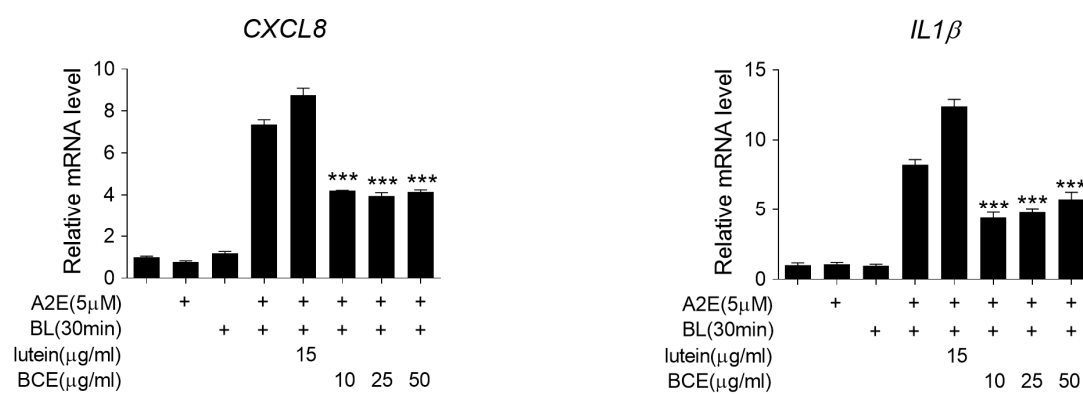

**Supplementary Figure S2.** Relative mRNA levels for inflammation and inflammasome-related gene. The results are presented as mean  $\pm$  S.D. ( $n = 3$ ). \*\*\*  $p < 0.001$  vs. A2E + BL.

**Figure S3**

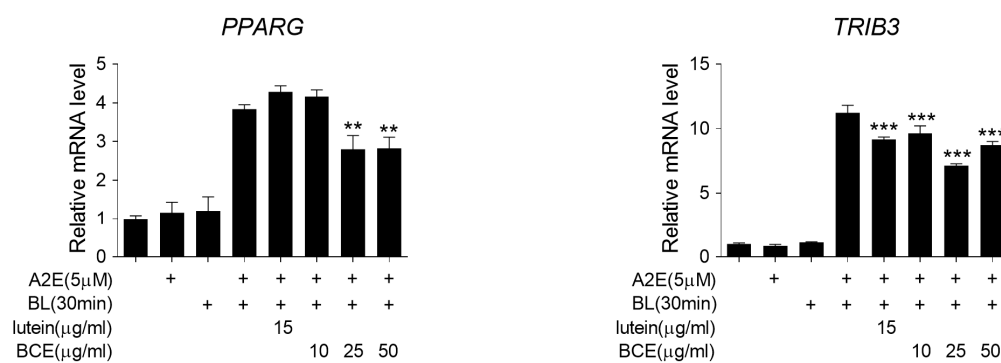

**Supplementary Figure S3.** Relative mRNA levels for cholesterol homeostasis-related genes. The results are presented as mean  $\pm$  S.D. ( $n = 3$ ). \*\*  $p < 0.01$ , \*\*\*  $p < 0.001$  vs. A2E + BL.

**Figure S4**

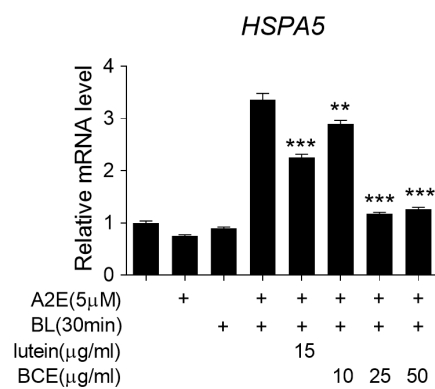

**Supplementary Figure S4.** Relative mRNA levels for protein folding-related gene. The results are presented as mean  $\pm$  S.D. ( $n = 3$ ). \*\*  $p < 0.01$ , \*\*\*  $p < 0.001$  vs. A2E + BL.

## Supplementary Tables

**Supplementary Table S1.** Composition of anthocyanins in BCE.

| Anthocyanins                   | Contents (mg/g) |
|--------------------------------|-----------------|
| Total anthocyanins             | 391.26 ± 2.81   |
| Delphinidin-3-rutinoside (D3R) | 147.98 ± 2.81   |
| Delphinidin-3-glucoside (D3G)  | 60.16 ± 1.06    |
| Cyanidin-3-rutinoside (C3R)    | 146.77 ± 2.77   |
| Cyanidin-3-glucoside (C3G)     | 35.07 ± 0.65    |

The results are presented as the mean ± standard deviation of three independent experiments (n = 3).

**Supplementary Table S2.** Primer sequences used for RT-qPCR.

| Gene          | Accession #        | Forward                    | Reverse                 |
|---------------|--------------------|----------------------------|-------------------------|
| <i>PHLDA1</i> | <i>NM_007350.3</i> | GGGCAAGACAAGGTTTTGAGGA     | TCGCAAGTTTTCAGTAGGGTGA  |
| <i>DUSP5</i>  | <i>NM_004419.4</i> | GTCTCACCTCGCTACTC          | GGGCTCTCTCACTCTCAAT     |
| <i>ATF3</i>   | <i>NM_001674.4</i> | GCTGTCACCACGTGCAGTATCTCA   | CTGTTCTCTCTTGCTGACAAGC  |
| <i>TRIB1</i>  | <i>NM_025195.4</i> | TTCAAGCAGATTGTCTCCGC       | AGTGGTGTTGAGGATCTCAG    |
| <i>CXCL8</i>  | <i>NM_000584.4</i> | TGAATTACGGAATAATGAGTTAGAAC | TCAACCAGCAAGAAATTACTAAT |
| <i>IL1B</i>   | <i>NM_000576.3</i> | CCACCTCCAGGGACAGGATA       | AACACGCAGGACAGGTACAG    |
| <i>PPARG</i>  | <i>NM_138712.5</i> | GGGATCAGCTCCGTGGATCT       | TGCACTTTGGTACTCTTGAGGTT |
| <i>TRIB3</i>  | <i>NM_021158.5</i> | GAGGAGGGAGACAGAGAAG        | TGGAAGGCACTGAAGGTT      |
| <i>HSPA5</i>  | <i>NM_005347.5</i> | AGCTGTAGCGTATGGTGCTG       | AAGGGGACATACATCAAGCAGT  |
| <i>18S</i>    | <i>M10098.1</i>    | GAGGATGAGGTGGAACGTGT       | TCTTCAGTCGCTCCAGGTCT    |
